# Supplementary material for: Bioinformatics-Based Analysis: Noncoding RNA-Mediated COL10A1 Is Associated with Poor Prognosis and Immune Cell Infiltration in Pancreatic Cancer
Source: Hindawi journal article supplement (doi:10.1155/2022/7904982), 2022-09-05

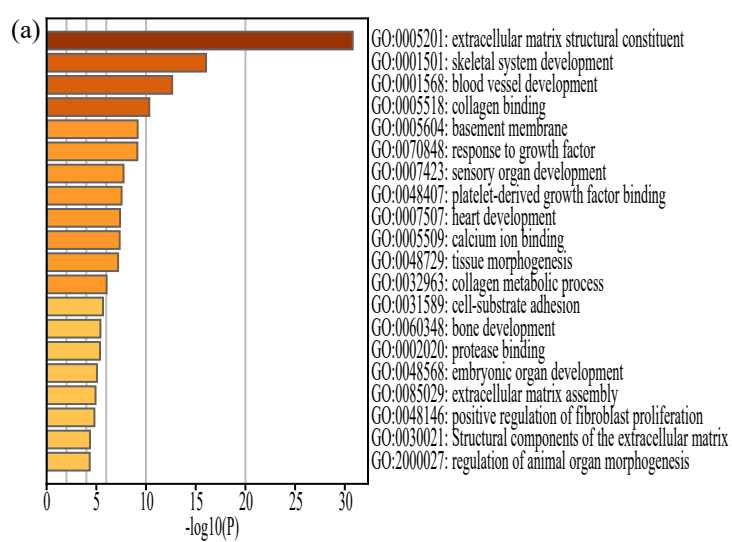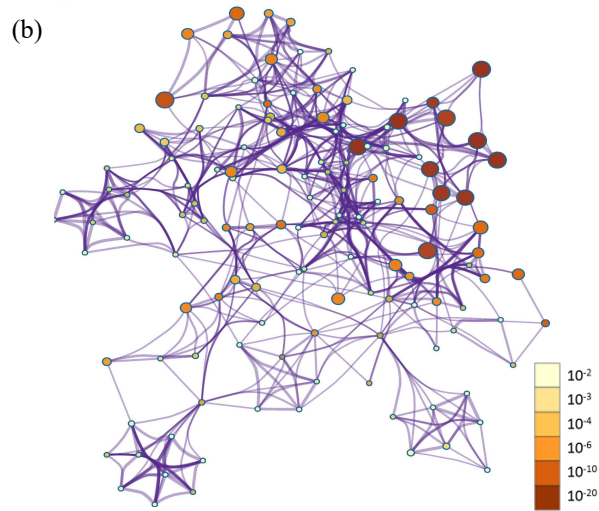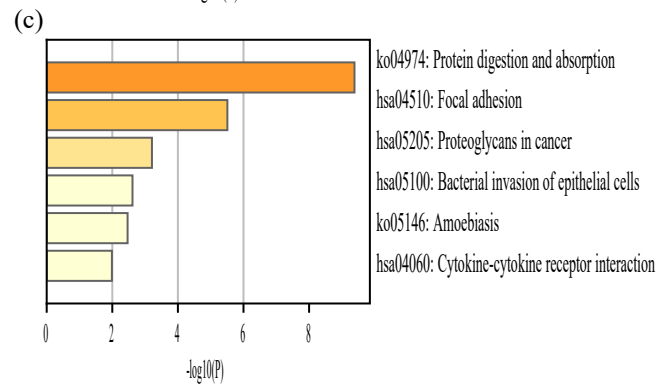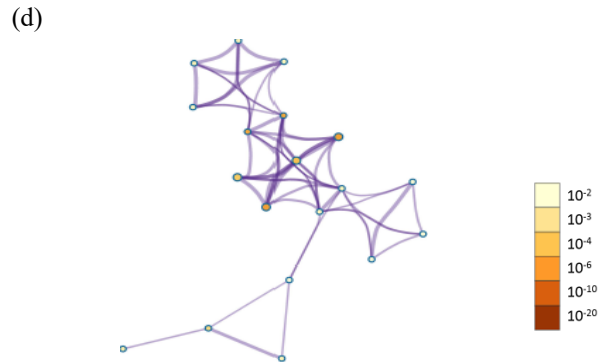

(e)

| Color | MCODE   | GO            | Description                                                                                                                 | Log <sub>10</sub> (P) |
|-------|---------|---------------|-----------------------------------------------------------------------------------------------------------------------------|-----------------------|
| ■     | MCODE_1 | M3005         | NABA collagens Collagen                                                                                                     | -28.5                 |
| ■     | MCODE_1 | R-HSA-8948216 | chain trimerization                                                                                                         | -28.5                 |
| ■     | MCODE_1 | M198          | PIO syndecan 1 pathway                                                                                                      | -28.3                 |
| ■     | MCODE_2 | R-HSA-8957275 | Post-translational protein phosphorylation                                                                                  | -17.0                 |
| ■     | MCODE_2 | R-HSA-381426  | Regulation of Insulin-like Growth Factor (IGF) transport and uptake by Insulin-like Growth Factor Binding Proteins (IGFBPs) | -16.5                 |
| ■     | MCODE_2 | R-HSA-2129379 | Molecules associated with elastic fibres                                                                                    | -7.1                  |

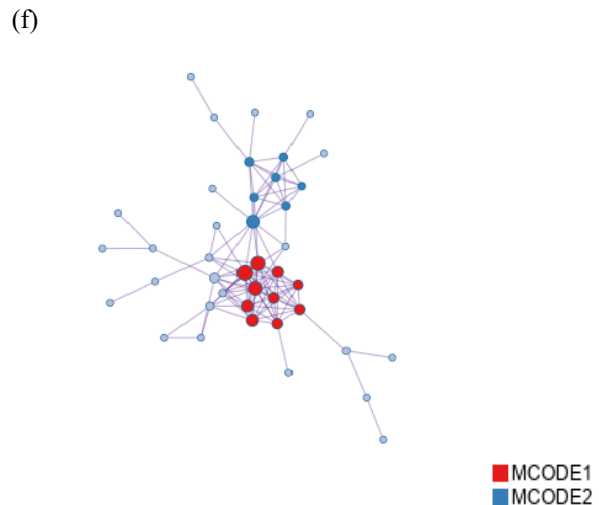

Supplement: f1 [file 7904982.f1.zip]
