# Supplementary figures and images for: Bioinformatics-Based Analysis: Noncoding RNA-Mediated COL10A1 Is Associated with Poor Prognosis and Immune Cell Infiltration in Pancreatic Cancer
Source: Hindawi journal article supplement (doi:10.1155/2022/7904982), 2022-09-05

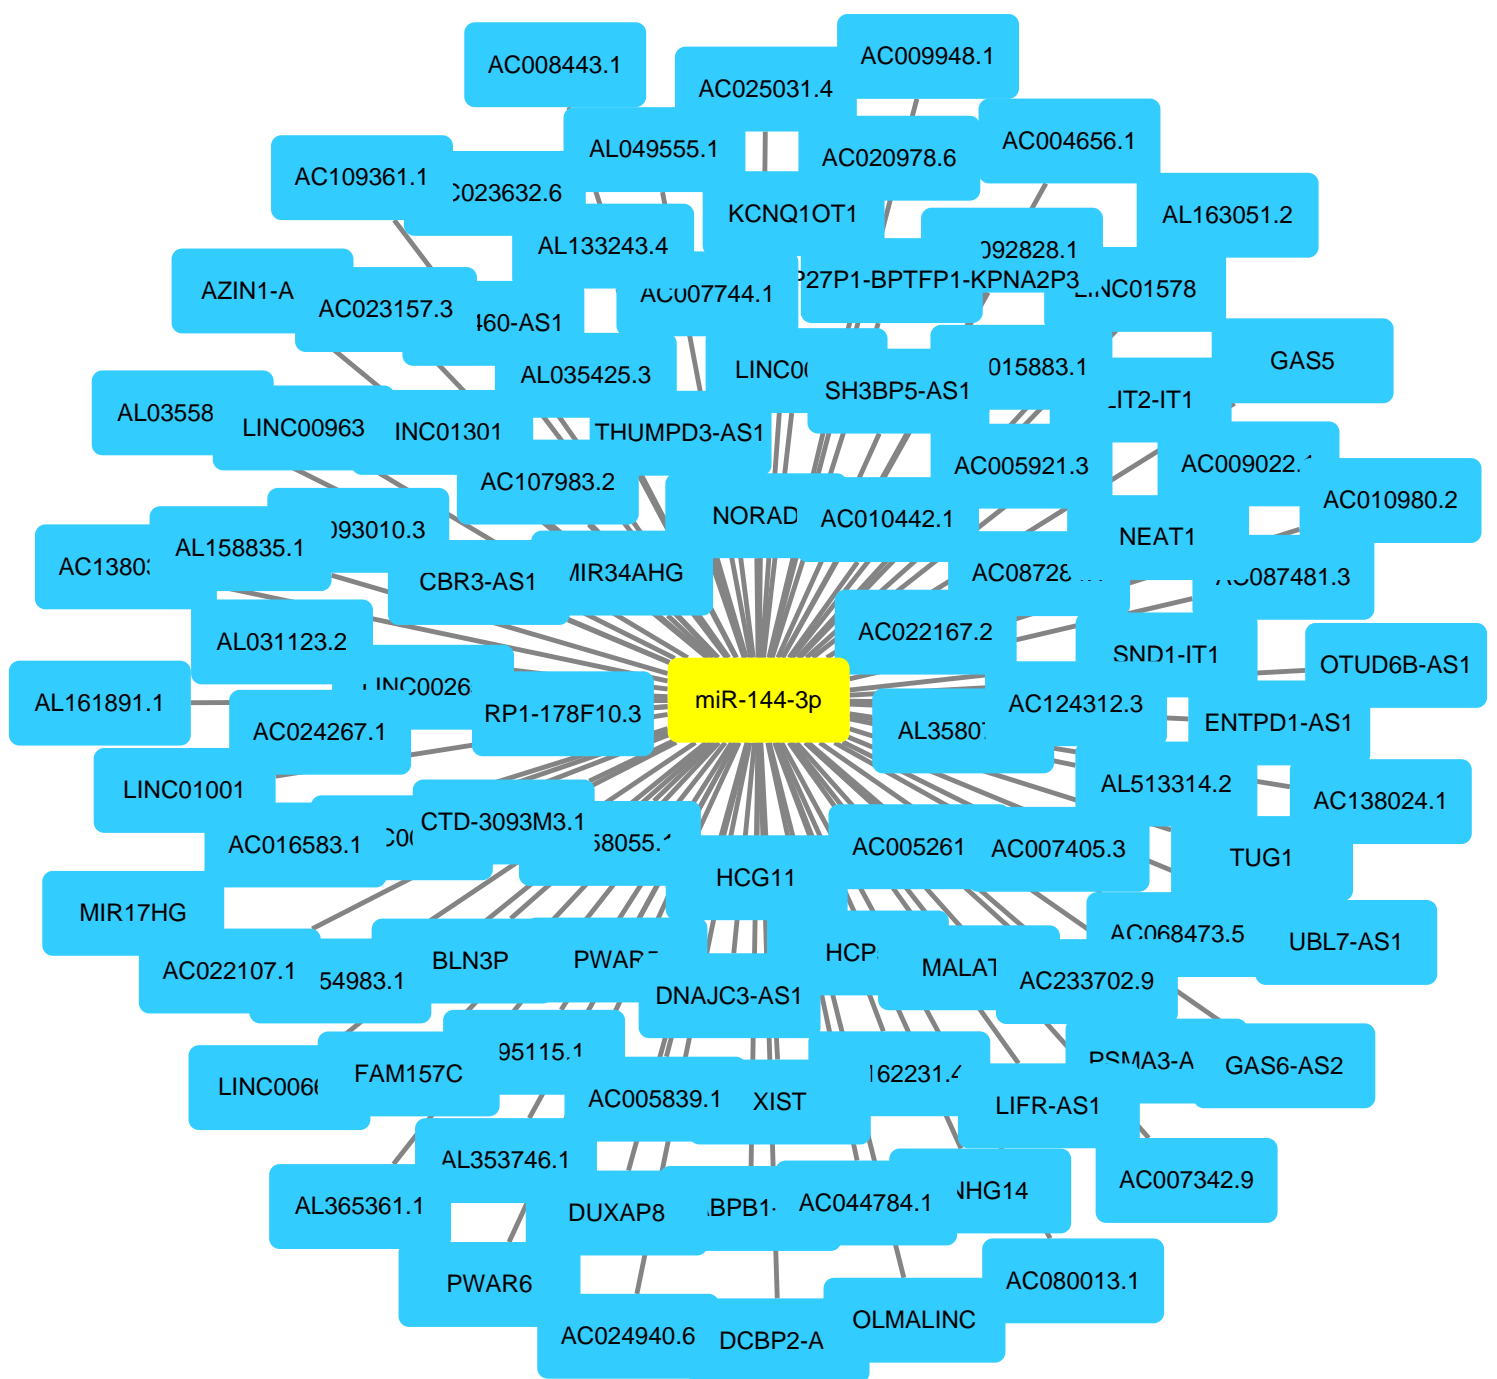

Supplement: f1 [file 7904982.f1.zip]

COL10A1

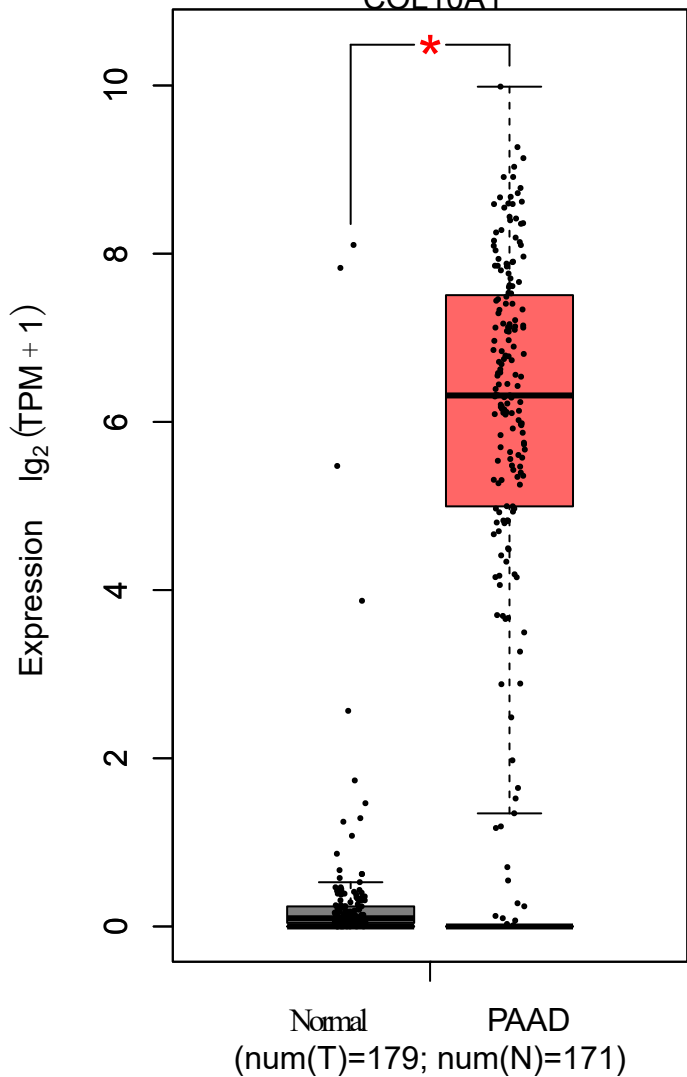

Supplement: f1 [file 7904982.f1.zip]
